# Supplementary material for: Neurogranin and VILIP-1 as Molecular Indicators of Neurodegeneration in Alzheimer’s Disease: A Systematic Review and Meta-Analysis
Source: PubMed Central journal article supplement (PMC7664397; doi:10.3390/ijms21218335), 2020-11-06

Supplementary contents for the article:

Neurogranin and VILIP-1 as indicators of neurodegeneration in Alzheimer's disease.

A systematic review and meta-analysis.

Table S1 Searching terms in databases in results with number of articles

|                        | "Neurogranin" AND<br>"Alzheimer's disease" | "VILIP-1" AND<br>"Alzheimer's disease" |
|------------------------|--------------------------------------------|----------------------------------------|
| SCOPUS Review          | 34                                         | 3                                      |
| SCOPUS Article         | 93                                         | 35                                     |
| SCOPUS ALL             | 141                                        | 40                                     |
| Web of Science Review  | 10                                         | 8                                      |
| Web of Science Article | 76                                         | 29                                     |
| Web of Science ALL     | 88                                         | 38                                     |
| PubMed Review          | 12                                         | 3                                      |
| PubMed Article         | 74                                         | 29                                     |
| PubMed ALL             | 86                                         | 32                                     |

Table S2 Supplemental content with results from data extraction.

| PMID                                    | Journal  | First author/Year              | AD group (n) | Neurogranin (Ng)      |                         |                | Controls (CTRL)     | Type of CTRL group                                                                    |
|-----------------------------------------|----------|--------------------------------|--------------|-----------------------|-------------------------|----------------|---------------------|---------------------------------------------------------------------------------------|
|                                         |          |                                |              | MCI group (n)         | MCI due to AD group (n) | sMCI group (n) |                     |                                                                                       |
| 1                                       | 3168967  | Alzheimers Dement.             | 102          | x                     | 56                      | x              | 47                  | Healthy controls                                                                      |
| 2                                       | 31097472 | J Neurol Neurosurg Psychiatry. | 46           | x                     | x                       | x              | 64                  | neurological controls                                                                 |
| 3                                       | 30853464 | Alzheimers Dement.             | 157          | AB+(n=263)/AB-(n=187) | x                       | x              | AB+(n=45) AB-(n=95) | Healthy controls                                                                      |
| 4A                                      | 29859129 | Alzheimers Res Ther.           | 36           | x                     | x                       | x              | 28                  | selected from the Amsterdam Dementia Cohort                                           |
| 4B                                      | 29859129 | Alzheimers Res Ther.           | 70           | x                     | x                       | x              | 20                  | selected from the Amsterdam Dementia Cohort                                           |
| 5                                       | 26092348 | Alzheimers Dement.             | 20           | x                     | x                       | x              | 29                  | controls                                                                              |
| 6                                       | 27392859 | J Alzheimers Dis               | 50           | 38                    | x                       | x              | 20                  | age-matched cognitively healthy elderly                                               |
| 7                                       | 31944489 | Hum Brain Mapp.                | 23           | x                     | 26                      | x              | 37                  | Healthy controls                                                                      |
| 8                                       | 31853477 | Alzheimers Dement.             | 46           | 57                    | x                       | x              | 90                  | cognitively normal controls                                                           |
| 9                                       | 29429972 | Neurology.                     | x            | 193                   | x                       | x              | 111                 | participants with normal cognition (ADNI)                                             |
| 10                                      | 26698298 | Alzheimers Res Ther.           | 39           | x                     | 13                      | x              | 21                  | non demented young controls (this group was not included in the original publication) |
| 11                                      | 26783546 | Ann Clin Transl Neurol.        | 74           | x                     | 35                      | 62             | 53                  | cognitively healthy controls                                                          |
| 12                                      | 26366630 | JAMA Neurol.                   | 65           | x                     | 36                      | 17             | 37                  | cognitively normal participants                                                       |
| 13A                                     | 25533203 | Alzheimers Dement.             | 16           | x                     | x                       | x              | 10                  | controls                                                                              |
| 13B                                     | 25533203 | Alzheimers Dement.             | 44           | x                     | x                       | x              | 30                  | controls                                                                              |
| 13C                                     | 25533203 | Alzheimers Dement.             | 40           | 40                    | x                       | x              | 40                  | controls                                                                              |
| 13D                                     | 25533203 | Alzheimers Dement.             | x            | x                     | 14                      | 23             | 0                   | controls                                                                              |
| 14                                      | 26136856 | Alzheimers Res Ther.           | 25           | x                     | x                       | x              | 20                  | healthy controls                                                                      |
| 15*                                     | 28731449 | J Alzheimers Dis               | 35           | 41                    | x                       | x              | 21                  | cognitively healthy controls                                                          |
| 16A                                     | 29959263 | Neurology.                     | 40           | x                     | x                       | x              | 25                  | unimpaired cognition were classified as controls                                      |
| 16B                                     | 29959263 | Neurology.                     | 61           | x                     | x                       | x              | 291                 | unimpaired cognition were classified as controls                                      |
| 17                                      | 28692877 | Neurobiol Aging.               | 65           | AB+(n=109)/AB-(n=36)  | x                       | x              | AB+(n=37) AB-(n=57) | Healthy controls                                                                      |
| 18                                      | 26373605 | Brain.                         | 95           | x                     | 105                     | 68             | 110                 | cognitively normal subjects                                                           |
| 19*                                     | 29702997 | Acta Neuropathol.              | 397          | 114                   | x                       | x              | 75                  | Controls                                                                              |
| 20*                                     | 27531278 | J Neural Transm (Vienna).      | 25           | 50                    | x                       | x              | 44                  | cognitively normal controls                                                           |
| 21                                      | 27321472 | Alzheimers Dement.             | 95           | 193                   | x                       | x              | 111                 | subjects with normal cognition                                                        |
| 22                                      | 29580670 | Alzheimers Dement.             | 16           | AB+(n=58)/AB-(n=18)   | x                       | x              | AB+(n=21) AB-(n=35) | Healthy controls                                                                      |
| 23                                      | 27018940 | JAMA Neurol.                   | 95           | x                     | x                       | x              | 207                 | cognitively normal controls                                                           |
| 24                                      | 30579367 | Alzheimers Res Ther.           | 40           | 35                    | x                       | x              | 335                 | cognitively-unimpaired individuals                                                    |
| 25                                      | 32021212 | Neuropsychiatr Dis Treat.      | 67           | 143                   | x                       | x              | 47                  | individuals with normal cognition                                                     |
| 26*                                     | 29667155 | Aging Clin Exp Res.            | 81           | 171                   | x                       | x              | 99                  | cognitively normal                                                                    |
| 27                                      | 26826204 | Neurology.                     | 100          | x                     | x                       | x              | 19                  | healthy controls                                                                      |
| 28                                      | 30447377 | Neurosci Lett.                 | 67           | 143                   | x                       | x              | 84                  | normal cognition                                                                      |
| <b>Visinin like protein 1 (VILIP-1)</b> |          |                                |              |                       |                         |                |                     |                                                                                       |
| 1.                                      | 26836160 | J Alzheimers Dis.              | 109          | 43                    | x                       | x              | 9                   | Healthy controls                                                                      |
| 2.                                      | 30529219 | Brain Behav.                   | 111          | 50                    | x                       | x              | 9                   | Healthy controls                                                                      |
| 3.                                      | 26383836 | Alzheimers Res Ther.           | 65           | 61                    | x                       | x              | 37                  | Cognitively normal                                                                    |
| 4.                                      | 18703769 | Clin Chem.                     | 33           | x                     | x                       | x              | 24                  | Cognitively normal controls                                                           |
| 5.                                      | 23800322 | J Neurochem.                   | 61           | x                     | x                       | x              | 40                  | Healthy elder controls                                                                |
| 6.                                      | 25159667 | J Alzheimers Dis.              | 33           | 15                    | x                       | x              | 18                  | Elderly individuals without cognitive deficits                                        |
| 7.                                      | 21823155 | Ann Neurol.                    | 98           | x                     | x                       | x              | 211                 | Cognitively normal controls                                                           |
| 8.                                      | 22357717 | Neurology.                     | 60           | x                     | x                       | x              | 211                 | Cognitively normal controls                                                           |
| 9.                                      | 25867677 | JAMA Neurol.                   | 23           | x                     | x                       | x              | 64                  | Cognitively normal controls                                                           |
| 10.                                     | 27018940 | JAMA Neurol.                   | 95           | x                     | x                       | x              | 207                 | Cognitively normal controls                                                           |
| 11.                                     | 30311914 | Transl Neurodegener.           | 18           | 24                    | x                       | x              | 32                  | Cognitively normal from ADNI database                                                 |

Table S3 Results of meta-analysis in each compared groups

| 1. Meta-analysis results of CSF neurogranin levels in patients with compared groups                                                     |                |                |                 |      |      |       |      |         |       |               |        |       |                |     |
|-----------------------------------------------------------------------------------------------------------------------------------------|----------------|----------------|-----------------|------|------|-------|------|---------|-------|---------------|--------|-------|----------------|-----|
| Group                                                                                                                                   | No. Figure     | No. of studies | No. of subjects |      | ROM  | 95%CI |      | z-score | p     | Heterogeneity |        |       |                |     |
|                                                                                                                                         |                |                |                 |      |      |       |      |         |       | Q             | p      | H     | I <sup>2</sup> |     |
| A                                                                                                                                       | AD vs CTRL     | 1   e-1        | 28              | 1894 | 2051 | 1,62  | 1,5  | 1,75    | 12,15 | 0,001         | 112,17 | 0,001 | 2,04           | 76% |
| B                                                                                                                                       | MCI-AD vs CTRL | 1   e-2        | 7               | 285  | 345  | 1,57  | 1,38 | 1,78    | 6,83  | 0,01          | 13,52  | 0,04  | 1,5            | 56% |
| C                                                                                                                                       | MCI-AD vs sMCI | 1   e-3        | 4               | 285  | 170  | 1,46  | 1,12 | 1,91    | 2,77  | 0,006         | 8,78   | 0,03  | 1,71           | 66% |
| D                                                                                                                                       | AD vs sMCI     | 1   e-4        | 3               | 234  | 147  | 1,32  | 1,15 | 1,51    | 4,04  | 0,001         | 0,01   | 0,99  | 1              | 0%  |
| E                                                                                                                                       | MCI vs CTRL    | 1   e-5        | 13              | 1280 | 1167 | 1,29  | 1,16 | 1,43    | 4,83  | 0,001         | 52,29  | 0,001 | 2,09           | 77% |
| F                                                                                                                                       | AD vs MCI      | 1   e-6        | 12              | 1017 | 1087 | 1,23  | 1,09 | 1,39    | 3,4   | 0,001         | 75,83  | 0,001 | 2,63           | 85% |
| G                                                                                                                                       | AD vs MCI-AD   | 1   e-7        | 6               | 398  | 271  | 1,02  | 0,94 | 1,11    | 0,42  | 0,67          | 5,78   | 0,33  | 1,08           | 14% |
| 2. Results of meta-analysis of cerebrospinal fluid neurogranin levels using electrochemiluminescence (ECL) in patients with AD and CTRL |                |                |                 |      |      |       |      |         |       |               |        |       |                |     |
|                                                                                                                                         | AD vs CTRL     | e-8-9          | 11              | 710  | 1199 | 1,64  | 1,53 | 1,76    | 13,91 | 0,001         | 13,32  | 0,21  | 1,15           | 25% |
| 3. Results of meta-analysis of cerebrospinal fluid neurogranin levels using ELISA in patients with AD and CTRL                          |                |                |                 |      |      |       |      |         |       |               |        |       |                |     |
|                                                                                                                                         | AD vs CTRL     | e-10-11        | 15              | 1024 | 608  | 1,7   | 1,46 | 1,99    | 6,72  | 0,001         | 53,92  | 0,001 | 1,96           | 74% |
| 4. Results of meta-analysis of cerebrospinal fluid neurogranin levels using detection antibodies (G62-P75) in patients with AD and CTRL |                |                |                 |      |      |       |      |         |       |               |        |       |                |     |
|                                                                                                                                         | AD vs CTRL     | e-12-13        | 4               | 202  | 158  | 1,26  | 1,07 | 1,48    | 2,83  | 0,005         | 5,17   | 0,16  | 1,31           | 42% |
| 5. Results of meta-analysis of cerebrospinal fluid neurogranin levels using detection antibodies (G52-G65) in patients with AD and CTRL |                |                |                 |      |      |       |      |         |       |               |        |       |                |     |
|                                                                                                                                         | AD vs CTRL     | e-14-15        | 21              | 1135 | 1574 | 1,73  | 1,59 | 1,88    | 12,86 | 0,001         | 44,76  | 0,001 | 1,5            | 55% |
| 6. Meta-analysis results of CSF neurogranin levels in patients with compared groups dependent of Aβ status                              |                |                |                 |      |      |       |      |         |       |               |        |       |                |     |
| A                                                                                                                                       | AD+ vs MCI-    | 2   e-16       | 3               | 238  | 241  | 1,59  | 1,38 | 1,85    | 6,24  | 0,001         | 0,23   | 0,89  | 1              | 0%  |
| B                                                                                                                                       | AD+ vs CTRL-   | 2   e-17       | 3               | 238  | 187  | 1,54  | 1,32 | 1,8     | 5,53  | 0,001         | 0,96   | 0,62  | 1              | 0%  |
| C                                                                                                                                       | MCI+ vs CTRL-  | 2   e-18       | 3               | 430  | 187  | 1,45  | 1,17 | 1,81    | 3,33  | 0,001         | 3,48   | 0,18  | 1,32           | 43% |
| D                                                                                                                                       | MCI+ vs CTRL+  | 2   e-19       | 3               | 430  | 103  | 1,22  | 1,02 | 1,46    | 2,18  | 0,03          | 0,13   | 0,94  | 1              | 0%  |
| E                                                                                                                                       | AD+ vs CTRL+   | 2   e-20       | 3               | 238  | 103  | 1,22  | 1    | 1,49    | 1,97  | 0,05          | 2,99   | 0,22  | 1,22           | 33% |
| F                                                                                                                                       | MCI- vs CTRL+  | 2   e-21       | 3               | 241  | 103  | 0,75  | 0,63 | 0,89    | -3,31 | 0,001         | 1,79   | 0,41  | 1              | 0%  |
| G                                                                                                                                       | AD+ vs MCI+    | 2   e-22       | 3               | 238  | 430  | 1,01  | 0,86 | 1,18    | 0,11  | 0,91          | 3,02   | 0,22  | 1,23           | 34% |
| H                                                                                                                                       | MCI- vs CTRL-  | 2   e-23       | 3               | 241  | 187  | 0,96  | 0,82 | 1,13    | -0,53 | 0,6           | 1,61   | 0,45  | 1              | 0%  |
| I                                                                                                                                       | CTRL+ vs CTRL- | 2   e-24       | 3               | 103  | 187  | 1,17  | 0,96 | 1,43    | 1,52  | 0,13          | 2,48   | 0,29  | 1,11           | 19% |
| 7. Meta-analysis results of CSF Visinin like protein 1 levels in patients with compared groups                                          |                |                |                 |      |      |       |      |         |       |               |        |       |                |     |
| A                                                                                                                                       | AD vs CTRL     | 3   e-25       | 11              | 706  | 862  | 1,34  | 1,28 | 1,41    | 11,69 | 0,001         | 360,51 | 0,001 | 6              | 97% |
| B                                                                                                                                       | AD vs MCI      | 3   e-26       | 5               | 336  | 193  | 1,27  | 1,02 | 1,59    | 2,14  | 0,001         | 149,83 | 0,001 | 6,12           | 97% |
| C                                                                                                                                       | MCI vs CTRL    | 3   e-27       | 5               | 193  | 105  | 1,12  | 1,07 | 1,18    | 5     | 0,001         | 7,68   | 0,1   | 1,39           | 48% |

1. Funnel plots of CSF ratios of neurogranin for each compared groups.

# A

Figure S1 Funnel plot of CSF Ng in Alzheimer's disease samples vs controls

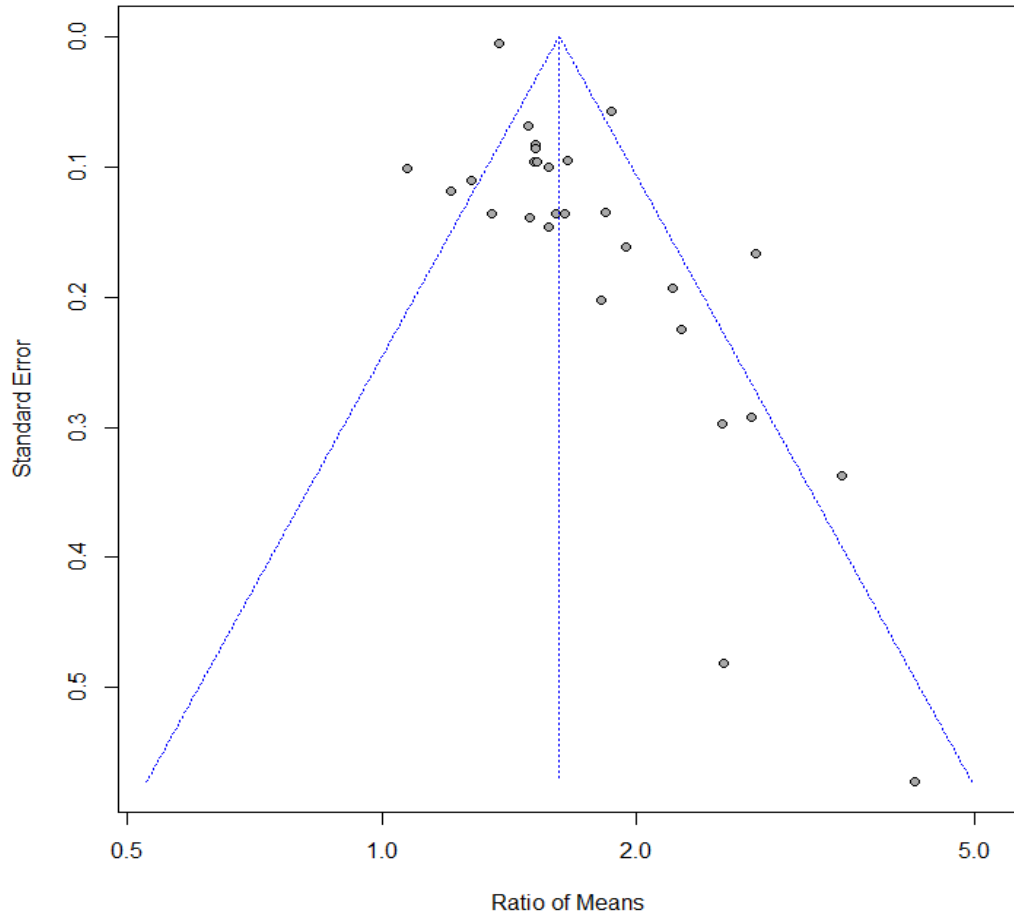

Figure S2 Funnel plot of CSF ratios of Ng between mild cognitive impairments due to Alzheimer's disease (MCI-AD) and controls (CTRL)

**B**

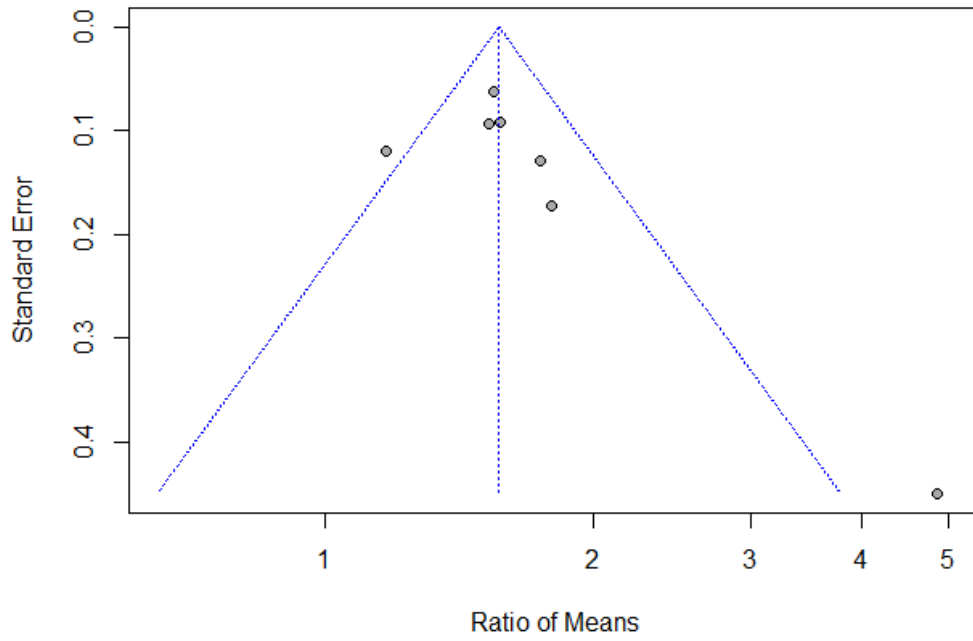

**C**

Figure S3 Funnel plot of CSF ratios of Ng between mild cognitive impairments due to Alzheimer's disease (MCI-AD) vs stable mild cognitive impairments (sMCI)

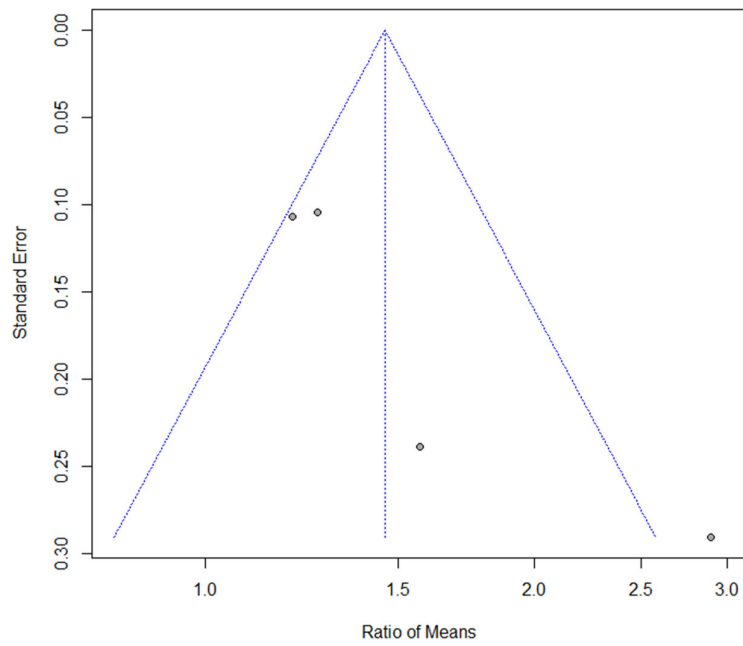

## D

Figure S4 Funnel plot of CSF ratios of Ng between Alzheimer's disease (AD) and stable mild cognitive impairments (sMCI)

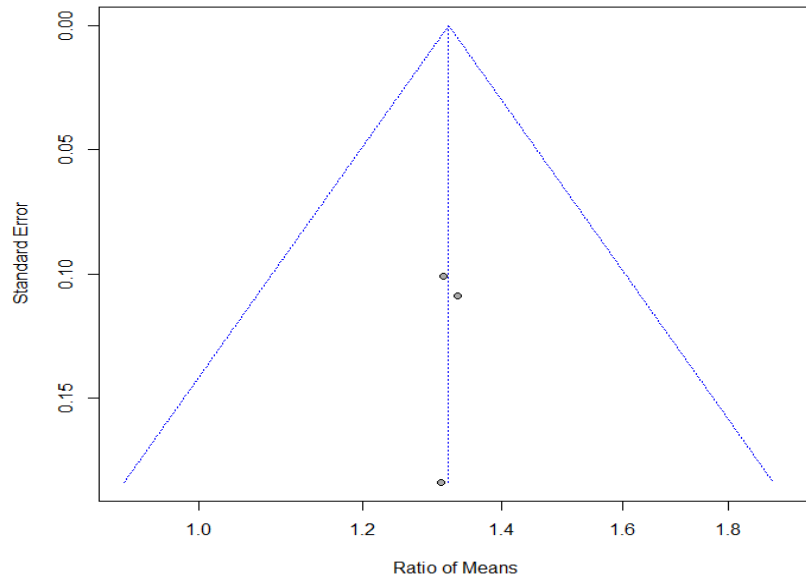

## E

Figure S5 Funnel plot of CSF ratios of Ng between mild cognitive impairments (MCI) vs controls (CTRL)

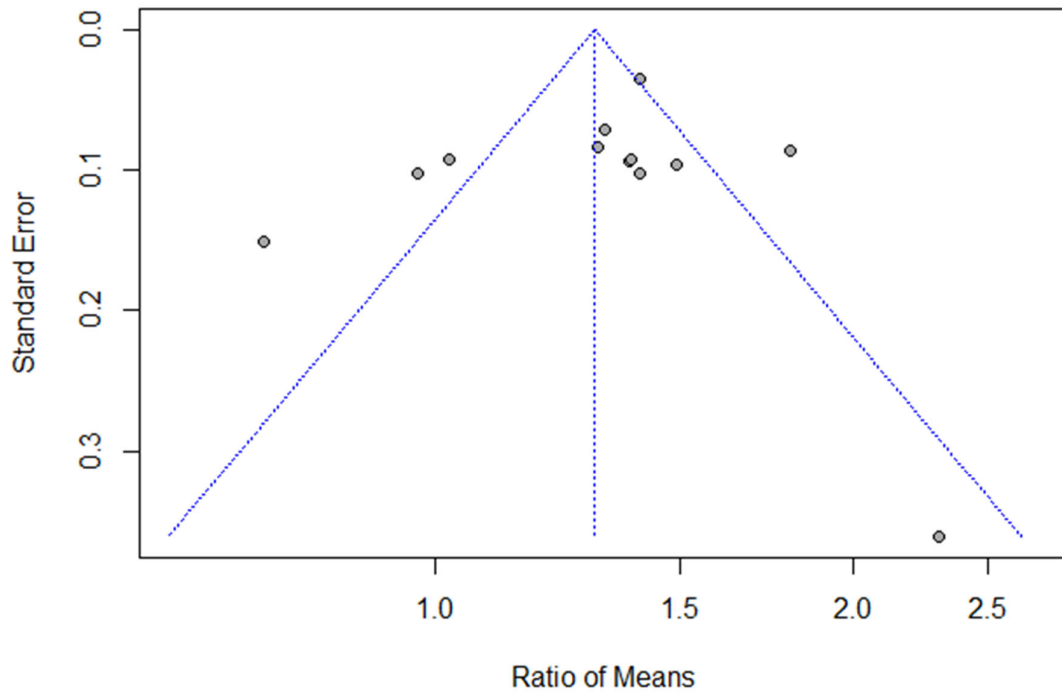

# F

Figure S6 Funnel plot of CSF ratios of Ng between Alzheimer's disease (AD) vs mild cognitive impairments (MCI)

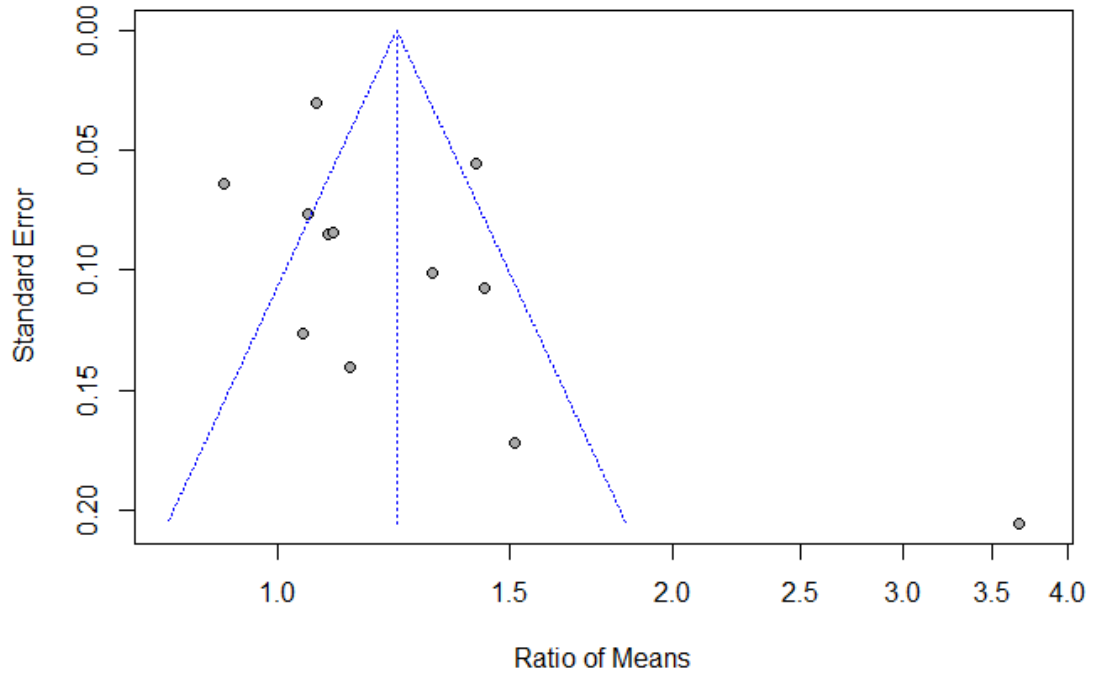

# G

Figure S7 Funnel plot of CSF ratios of Ng between Alzheimer's disease (AD) and mild cognitive impairments due to Alzheimer's disease (MCI-AD)

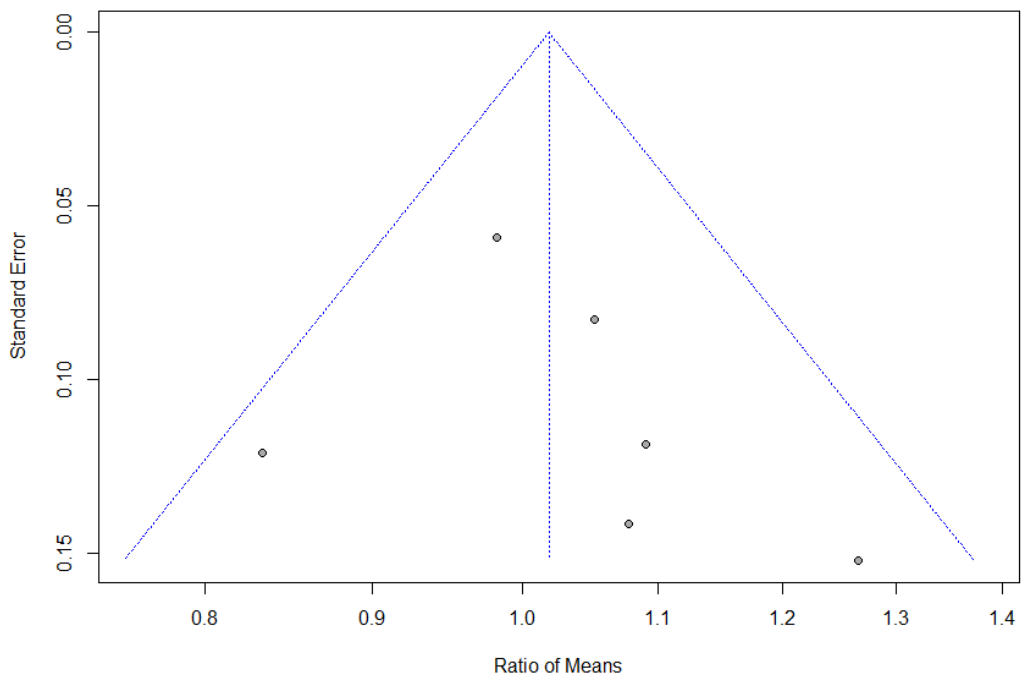

## 2. Forest plot and funnel plot CSF neurogranin levels using electrochemiluminescence (ECL) in patients with AD and CTRL

Figure S8 CSF ratios of Electrochemiluminescence

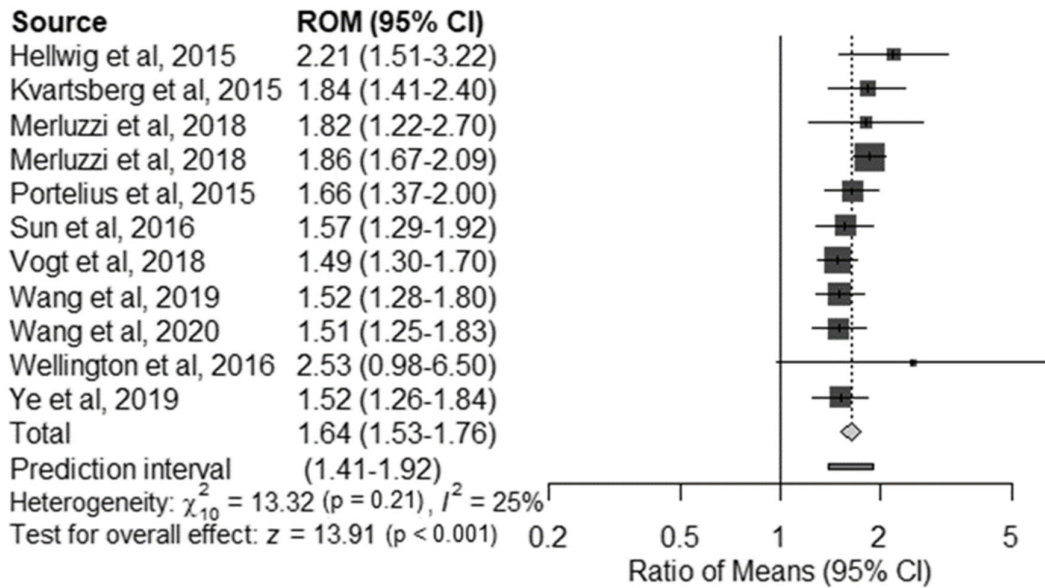

Figure S9 Funnel plot of CSF ratios of Electrochemiluminescence

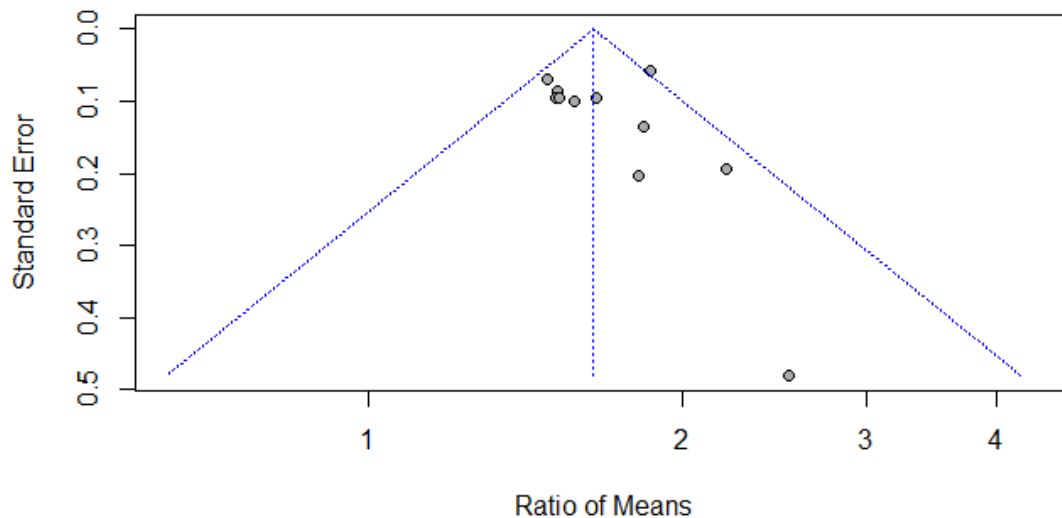

### 3. Forest plot and funnel plot CSF neurogranin levels using ELISA in patients with AD and CTRL

Figure S10 CSF ratios of ELISA

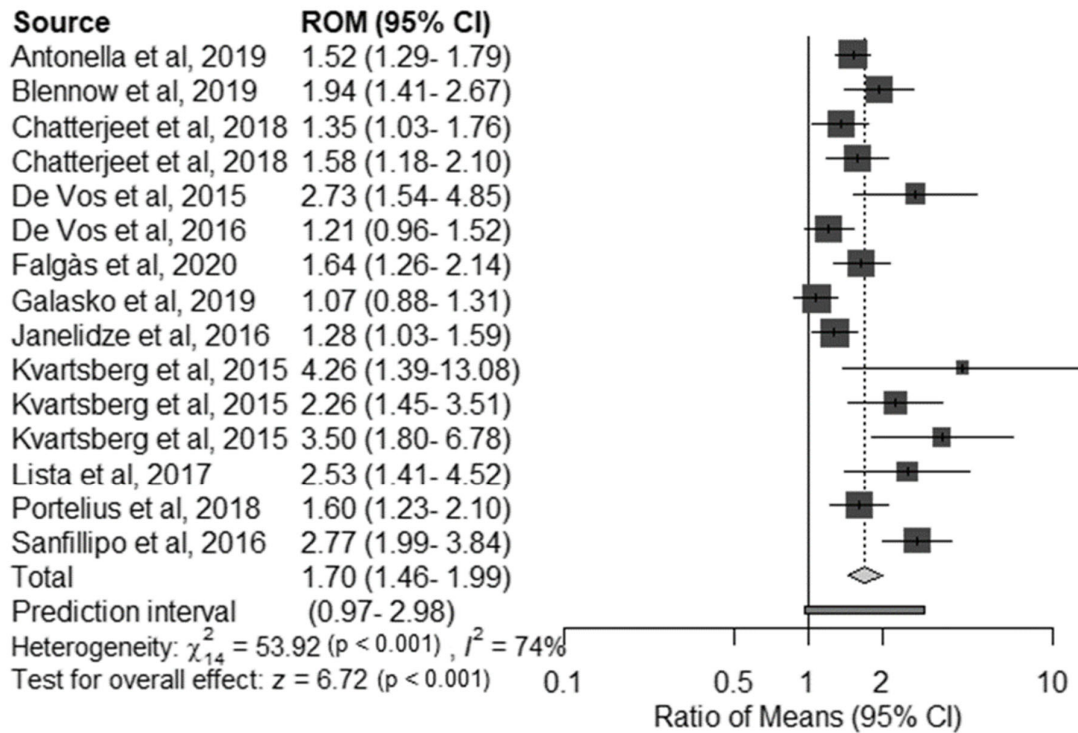

Figure S11 Funnel plot of CSF ratios of ELISA

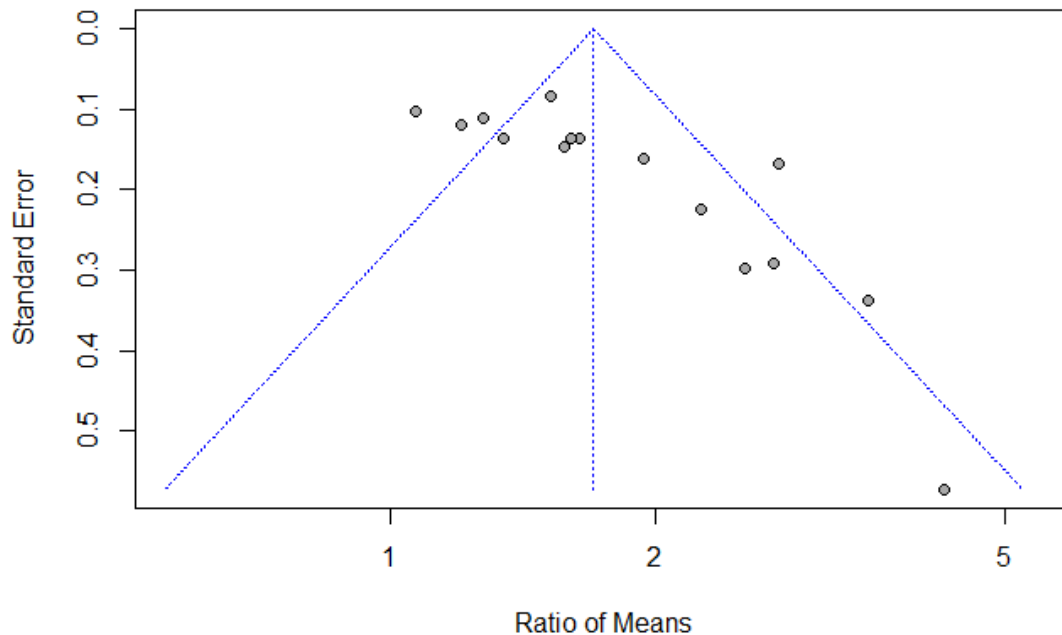

### 4. Forest plot and funnel plot CSF neurogranin levels using detection antibodies (G62-P75) in patients with AD and CTRL



Figure S12 CSF ratios of Ng (G62-P75)

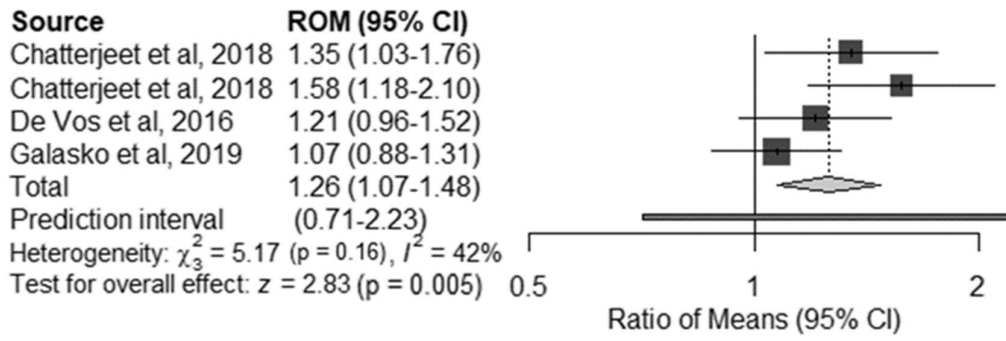

Figure S13 Funnel plot of CSF ratios of Ng (G62-P75)

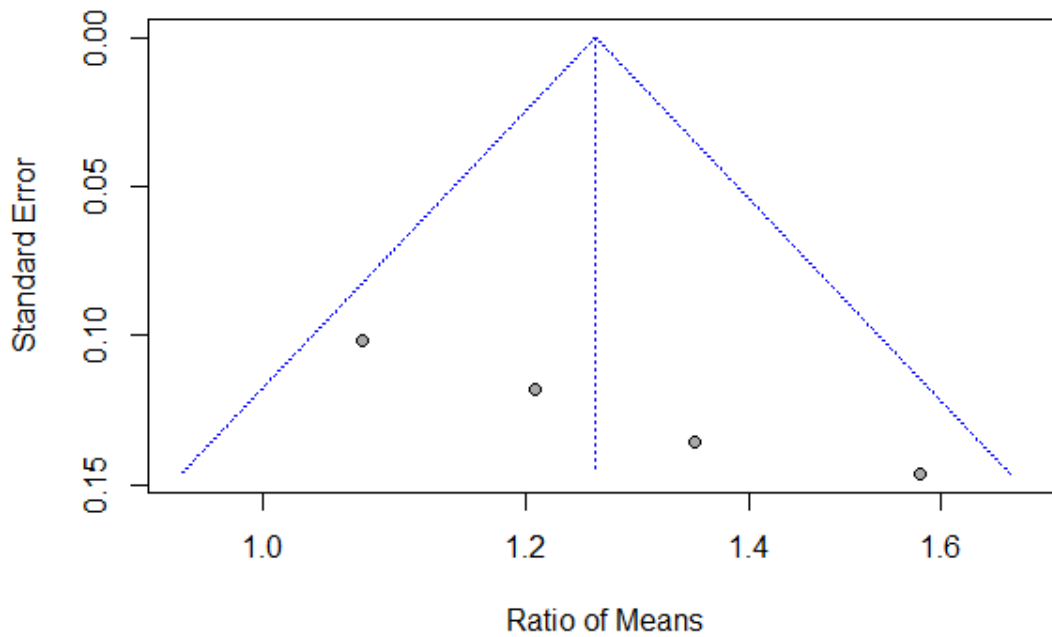

## 5. Forest plot and funnel plot CSF neurogranin levels using detection antibodies (G62-G65) in patients with AD and CTRL

Figure S14 CSF ratios of Ng7 (G52-G65)

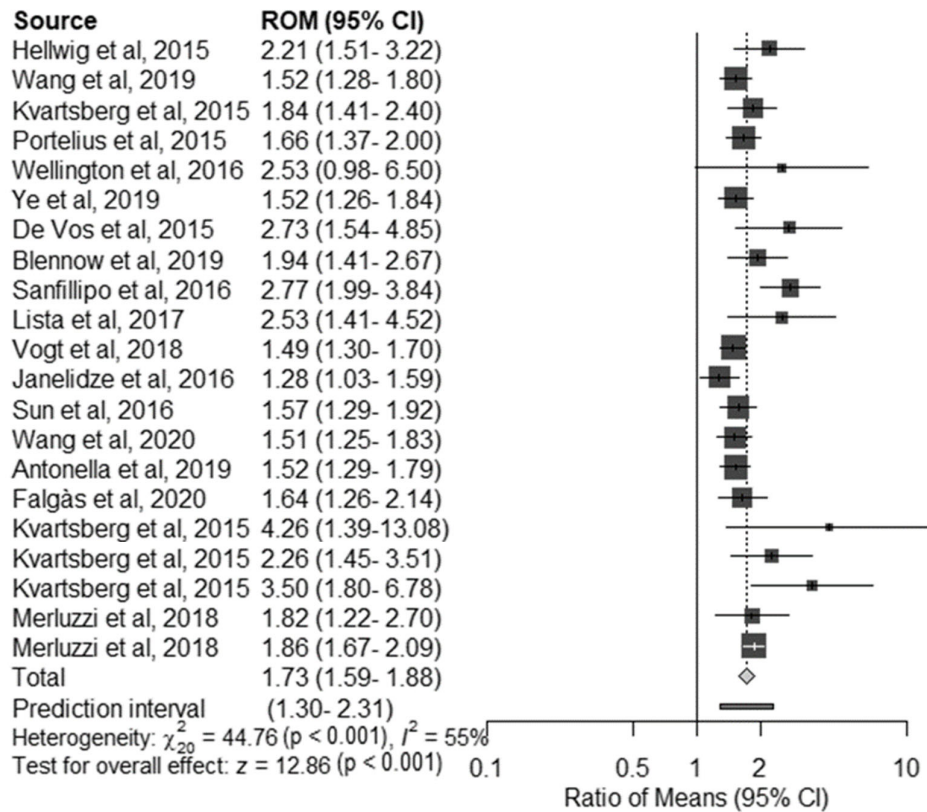

Figure S15 Funnel plot of CSF ratios of Ng7 (G52-G65)

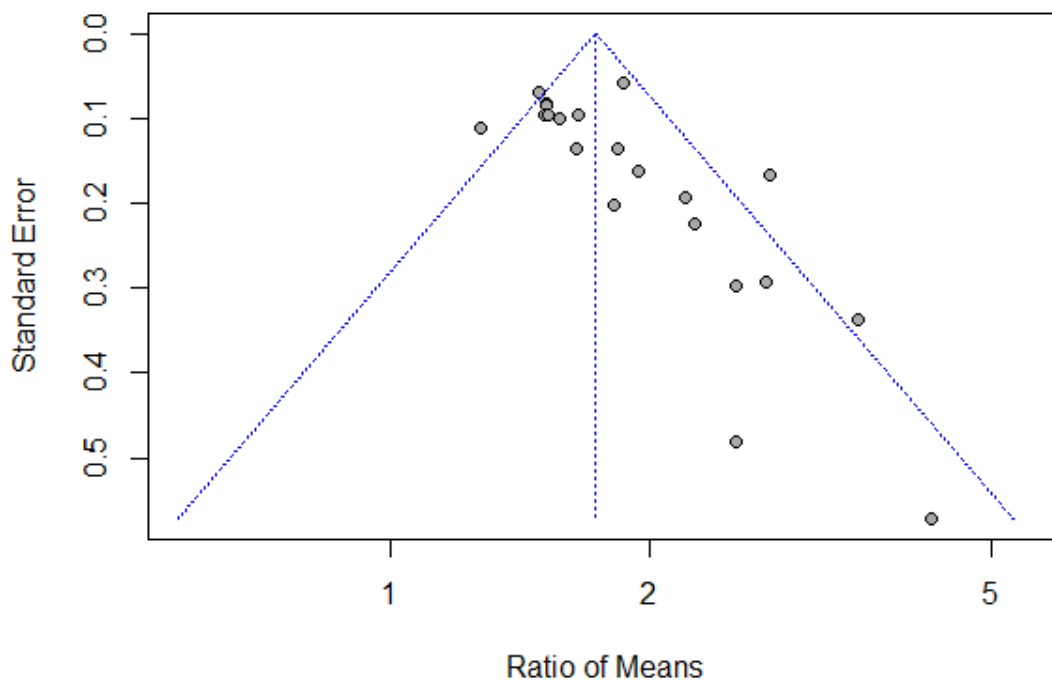

## 6. Funnel plots of CSF neurogranin levels in patients with compared groups dependent on A $\beta$ status.

**A**

Figure S16 Funnel plot of CSF ratios of Ng between AD+ group compared to MCI-

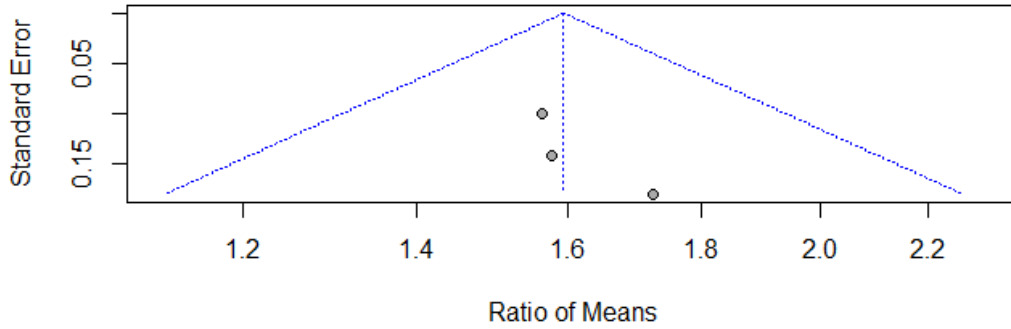

**B**

Figure S17 Funnel plot of CSF ratios of Ng between AD+ group vs MCI-

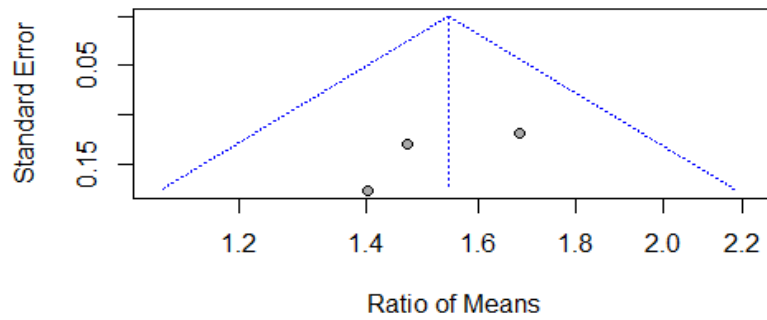

**C**

Figure S18 Funnel plot of CSF ratios of Ng between MCI+ group vs CTRL-

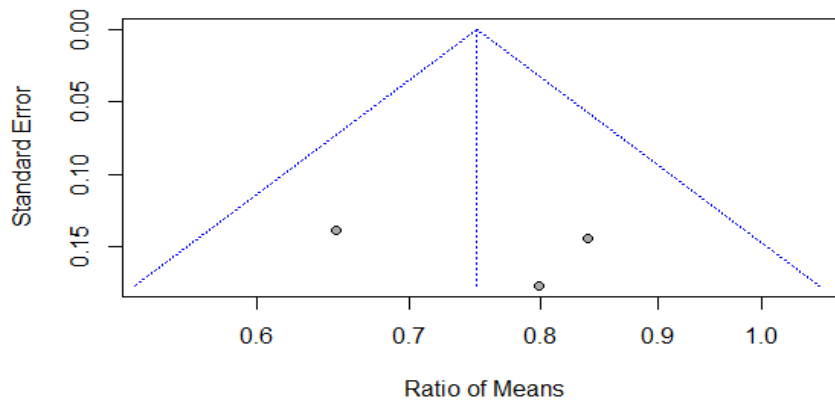

### D

Figure S19 Funnel plot of CSF ratios of Ng between MCI+ group compared to CTRL+

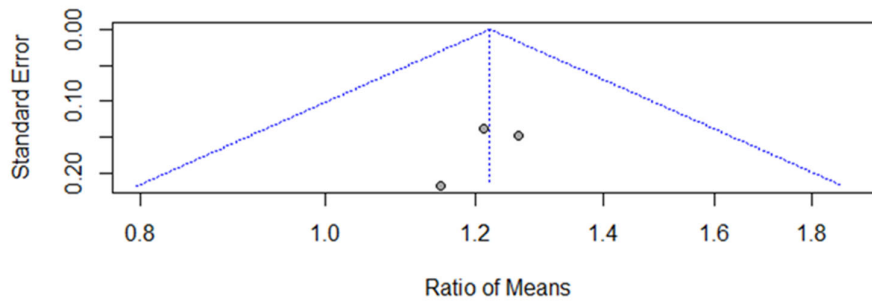

### E

Figure S20 Funnel plot of CSF ratios of Ng between AD+ group vs CTRL+

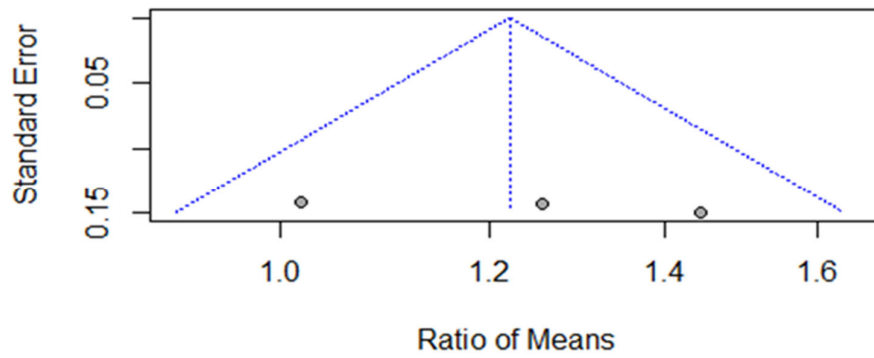

### F

Figure S21 Funnel plot of CSF ratios of MCI+ vs CTRL+

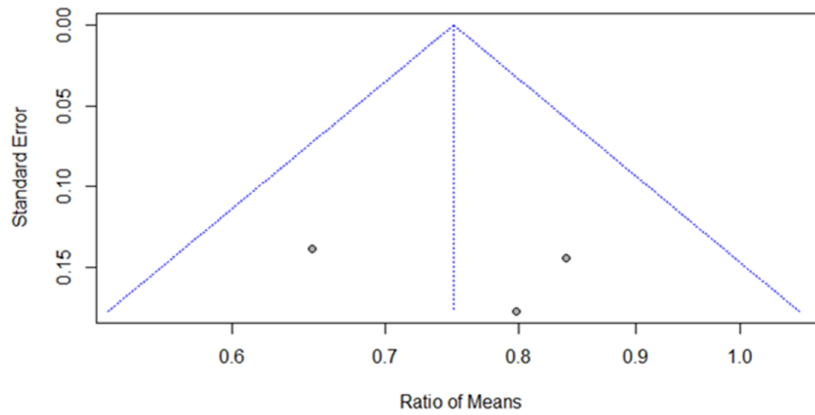

# G

Figure S22 Funnel plot of CSF ratios of Ng between AD+ group compared to MCI+

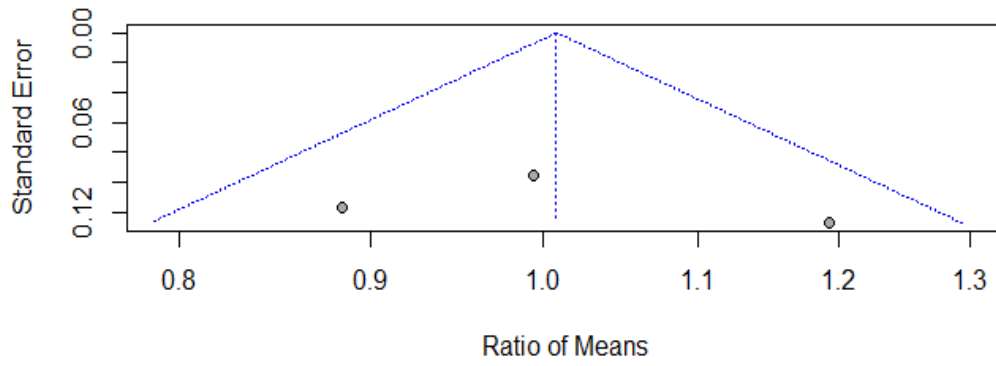

# H

Figure S23 Funnel plot of CSF ratios of Ng between MCI- group vs CTRL-

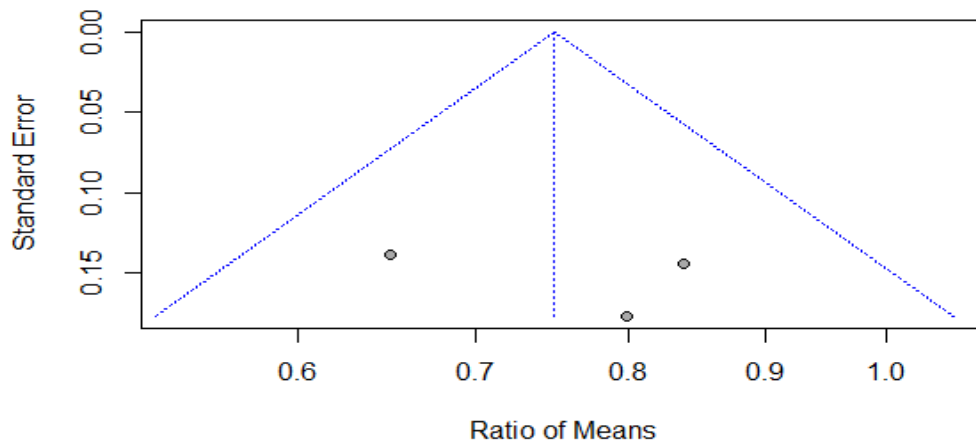

# I

Figure S24 Funnel plot of CSF ratios of CTRL+ vs CTRL-

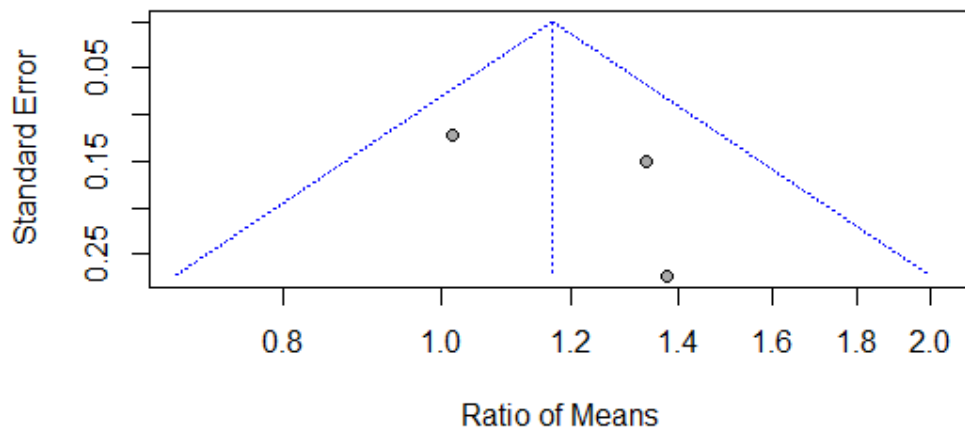

## 7. Funnel plots with CSF ratios of VILIP-1 for each compared groups.

**A**

Figure S25 Funnel plot of CSF ratios of VILIP-1 between Alzheimer's disease (AD) and controls (CTRL)

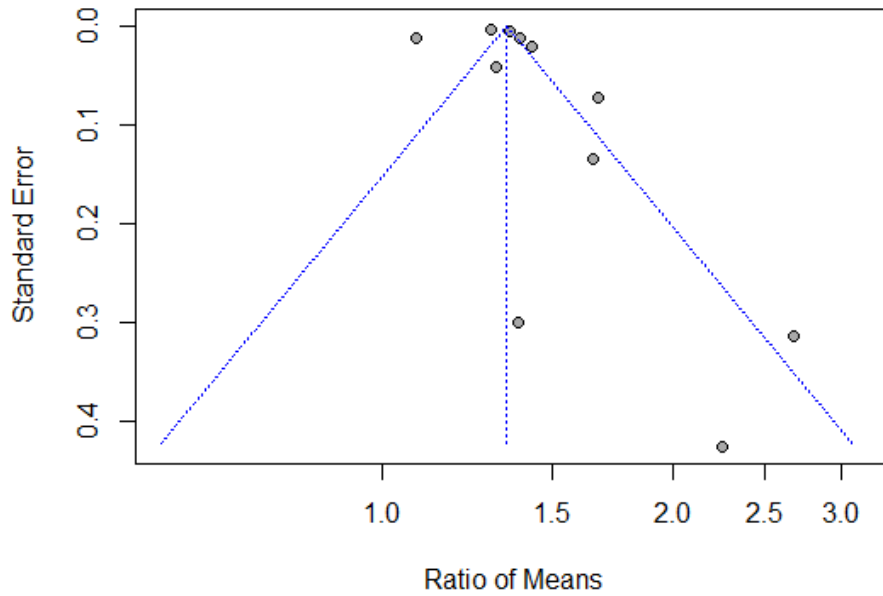

**B**

Figure S26 Funnel plot of CSF ratios of VILIP-1 between Alzheimer's disease (AD) and mild cognitive impairments (MCI)

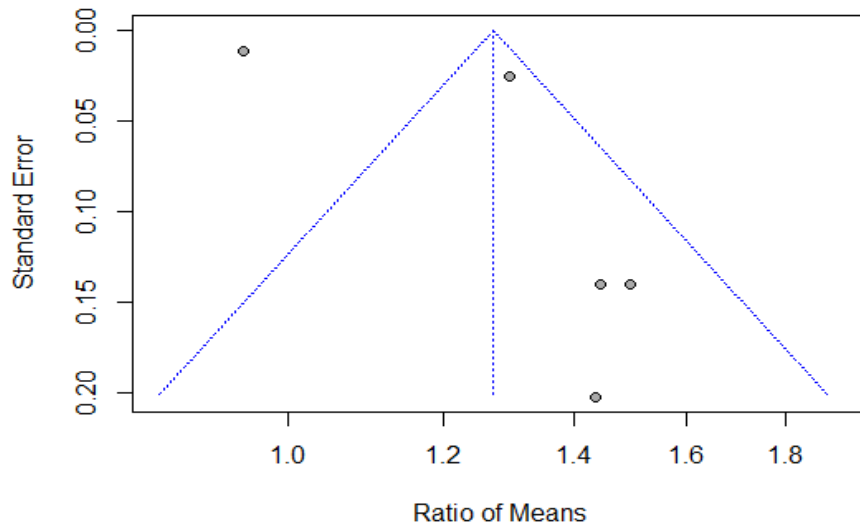

# C

Figure S27 Funnel plot of CSF ratios of VILIP-1 between mild cognitive impairments (MCI) and controls (CTRL)

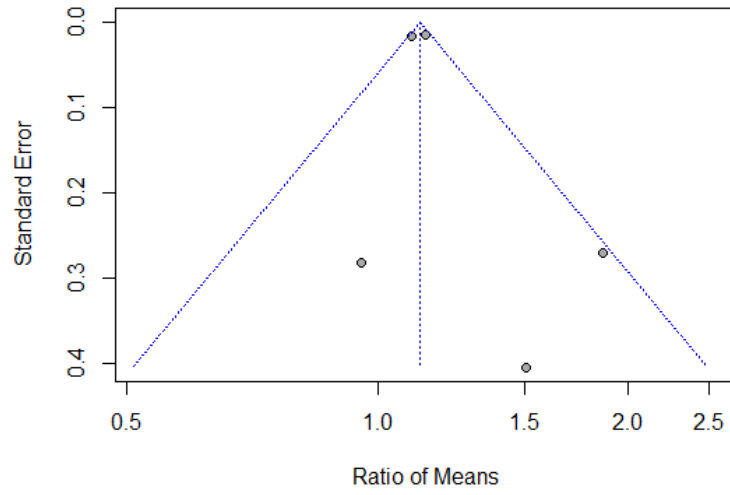

Supplement: ijms-21-08335-s001.pdf [file ijms-21-08335-s001.pdf]
